# Supplementary material
Source: publisher figshare collection journal article supplement (https://sage.figshare.com/ndownloader/files/23553662)
Supplement: Supplementary file 1 [file 23553662]

## Supplementary Materials

Strategy of Landfilled Waste Reduction by a Distributed Material Recovery Facility System in

Surabaya, Indonesia

Afif Faiq Muhamad, Kazuei Ishii, Masahiro Sato, Satoru Ochiai

Graduate School of Engineering, Hokkaido University, Japan

N13, W8, Kita-ku, Sapporo, Hokkaido, 060-8628, Japan

## Tables

Table S1. Temporary waste disposal sites' capacity and transportation frequency

| <b>Daily Transportation<br/>Frequency</b> | <b>Capacity (m<sup>3</sup>)</b> |          |           |           |
|-------------------------------------------|---------------------------------|----------|-----------|-----------|
|                                           | <b>6</b>                        | <b>8</b> | <b>10</b> | <b>14</b> |
| <b>TS</b>                                 |                                 |          |           |           |
| <1                                        | 15                              | 18       | -         | 18        |
| 1                                         | 10                              | 11       | 8         | 39        |
| 1-2                                       | 1                               | 2        | 2         | 14        |
| 2                                         | 5                               | 3        | -         | 34        |
| 3                                         | -                               | -        | 2         | 6         |
| 3-4                                       | -                               | -        | -         | 1         |
| 4                                         | -                               | -        | 1         | 3         |
| 4-5                                       | -                               | -        | -         | 1         |
| 5                                         | -                               | -        | -         | 2         |
| 6                                         | -                               | -        | 1         | -         |
| <b>MRF</b>                                |                                 |          |           |           |
| 1                                         | -                               | -        | -         | 1         |
| 1-2                                       | 1                               | -        | -         | -         |

Table S2. Detail of investment cost

| <b>Unit</b>                       | <b>Value (IDR)</b> |
|-----------------------------------|--------------------|
| MRF Building <sup>1</sup>         | 480,000,000        |
| Shredder                          | 22,825,000         |
| Conveyor Belt                     | 693,000,000        |
| Baler                             | 65,000,000         |
| Composting Site Area <sup>2</sup> | 960,000,000        |
| Screen Plant <sup>2</sup>         | 271,000,000        |

<sup>1</sup>(Mega and Trihadiningrum, 2010)

<sup>2</sup>(Wahyono and Sahwan, 2006)

Table S3. Operation and maintenance cost for one MRF

| Details                            | Cost                  | Unit                |
|------------------------------------|-----------------------|---------------------|
| Monthly Salary                     | 3,500,000             | IDR/person/month    |
| Number of Workers (inside the MRF) | 13                    | person              |
| Working Period                     | 12                    | month/year          |
| <b>Salary</b>                      | <b>10,920,000,000</b> | <b>IDR/20 years</b> |
| Machinery Maintenance Ratio        | 5%                    | per year            |
| Shredder                           | 2,282,500             | IDR/year            |
| Conveyor Belt                      | 69,300,000            | IDR/year            |
| Baler                              | 6,500,000             | IDR/year            |
| <b>Maintenance Cost</b>            | <b>1,561,650,000</b>  | <b>IDR/20 years</b> |
| Fuel Price                         | 5,150                 | IDR/liter           |
| Fuel Needed for Machinery          | 5.7                   | liter/day           |
| Working Days                       | 7300                  | day/20 years        |
| <b>Fuel Cost</b>                   | <b>214,291,500</b>    | <b>IDR/20 years</b> |
| Electricity Price                  | 1,343                 | IDR/kWh             |
| Water Pump Power                   | 0.15                  | kW                  |
| Water Pump Working Time            | 2                     | hour/day            |
| Water Pump Working Days            | 7300                  | day/20 years        |
| <b>Water Pump Operational Cost</b> | <b>2,941,126</b>      | <b>IDR/20 years</b> |
| Lamp Power                         | 0.2                   | kW                  |
| Lamp Working Time                  | 8                     | hour/day            |
| Lamp Working Days                  | 7300                  | day/20 years        |
| <b>Lamp Operational Cost</b>       | <b>15,686,006</b>     | <b>IDR/20 years</b> |
| Computer Power                     | 0.5                   | kW                  |
| Computer Working Time              | 8                     | hour/day            |
| Computer Working Days              | 7300                  | day/20 years        |
| <b>Computer Operational Cost</b>   | <b>39,215,016</b>     | <b>IDR/20 years</b> |
| <b>Total OM cost</b>               | <b>12,753,783,649</b> | <b>IDR/20 years</b> |
|                                    | <b>637,689,182</b>    | <b>IDR/year</b>     |

Table S4. Operation and maintenance cost for one composting site

| <b>Details</b>                     | <b>Cost</b>          | <b>Unit</b>         |
|------------------------------------|----------------------|---------------------|
| Monthly Salary                     | 3,500,000            | IDR/month/person    |
| Number of Workers                  | 7                    | person              |
| Working Period                     | 240                  | month               |
| <b>Salary</b>                      | <b>5,880,000,000</b> | <b>IDR/20 years</b> |
| Machinery Maintenance Ratio        | 5%                   | /year               |
| Screen Plant Maintenance           | 27,100,000           | IDR/year            |
| Shredder Maintenance               | 2,282,500            | IDR/year            |
| <b>Maintenance Cost</b>            | <b>587,650,000</b>   | <b>IDR/20 years</b> |
| Fuel Price                         | 5,150                | IDR/liter           |
| Fuel Needed for Machinery          | 1.5                  | liter/day           |
| Working Days                       | 7300                 | day/20 years        |
| <b>Fuel Cost</b>                   | <b>56,392,500</b>    | <b>IDR/20 years</b> |
| Electricity Price                  | 1,343                | IDR/kWh             |
| Water Pump Power                   | 0.15                 | kWh                 |
| Water Pump Working Time            | 2                    | hour/day            |
| Water Pump Working Days            | 7300                 | day/20 years        |
| <b>Water Pump Operational Cost</b> | <b>2,941,126</b>     | <b>IDR/20 years</b> |
| Lamp Power                         | 0.2                  | kWh                 |
| Lamp Working Time                  | 8                    | hour/day            |
| Lamp Working Days                  | 7300                 | day/20 years        |
| <b>Lamp Operational Cost</b>       | <b>15,686,006</b>    | <b>IDR/20 years</b> |
| <b>Total OM cost</b>               | <b>6,542,669,633</b> | <b>IDR/20 years</b> |
|                                    | <b>327,133,482</b>   | <b>IDR/year</b>     |

## Figures

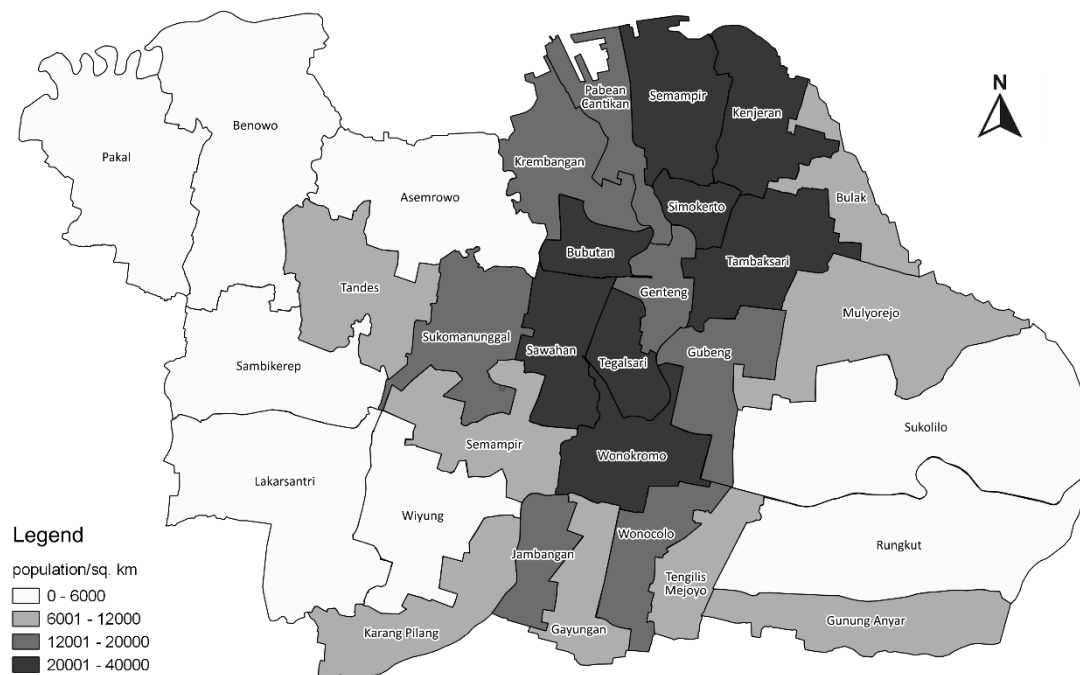

Fig. S1. Map of the study area with the population density distribution

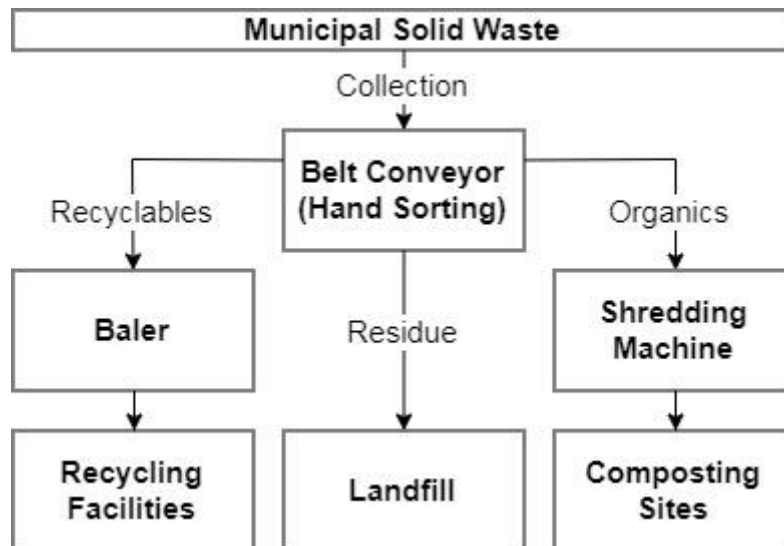

Fig. S2. Waste flow in MRF

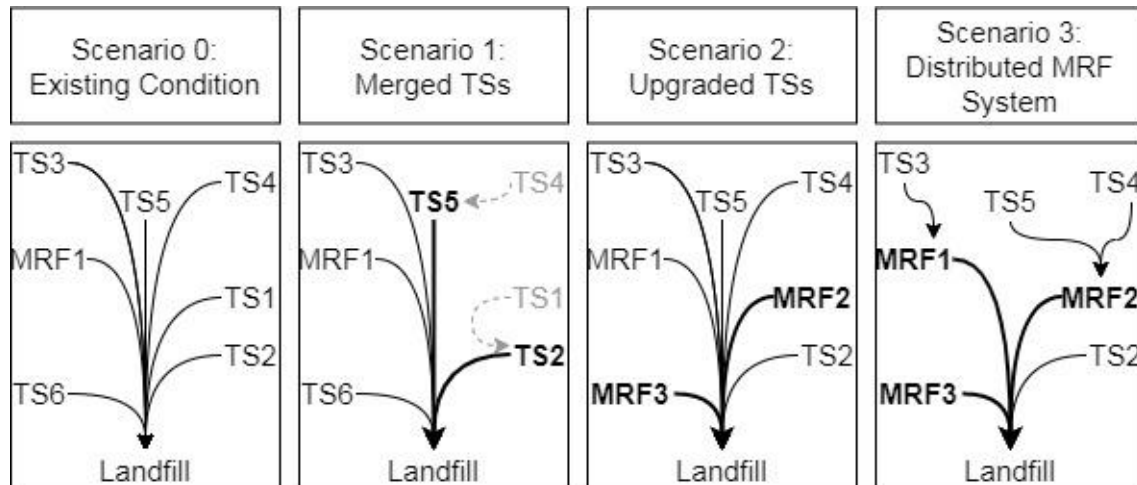

Fig. S3. Scenario setting



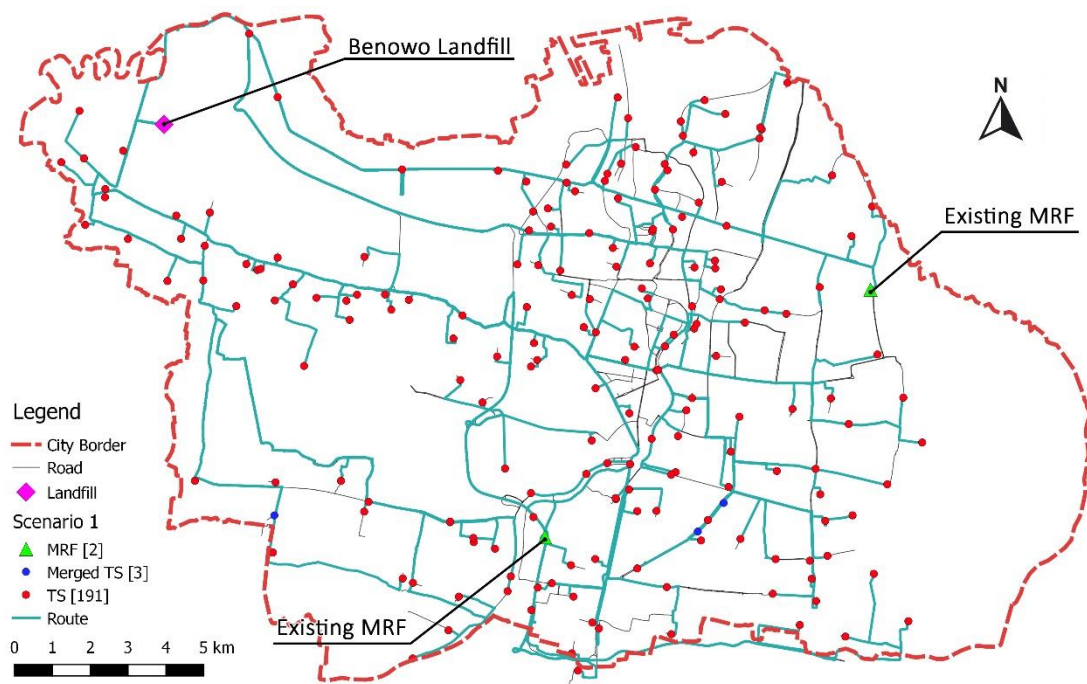

Fig. S4. Transportation route in Scenario 1

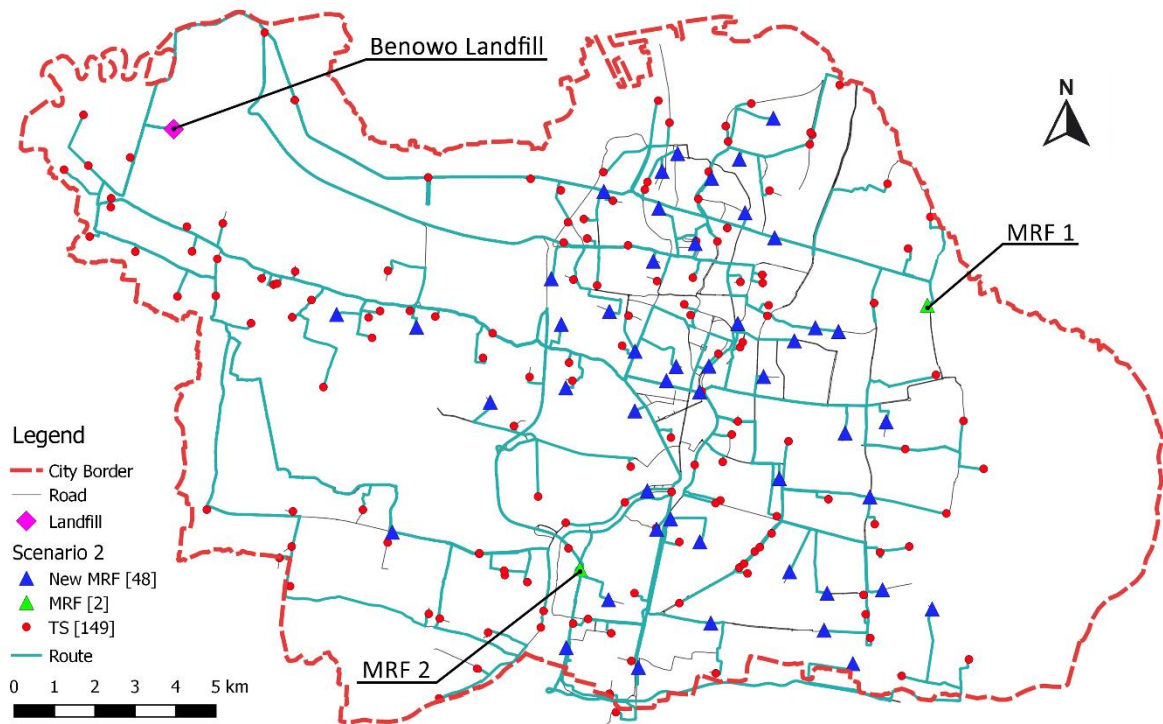

Fig. S5. Transportation route in Scenario 2

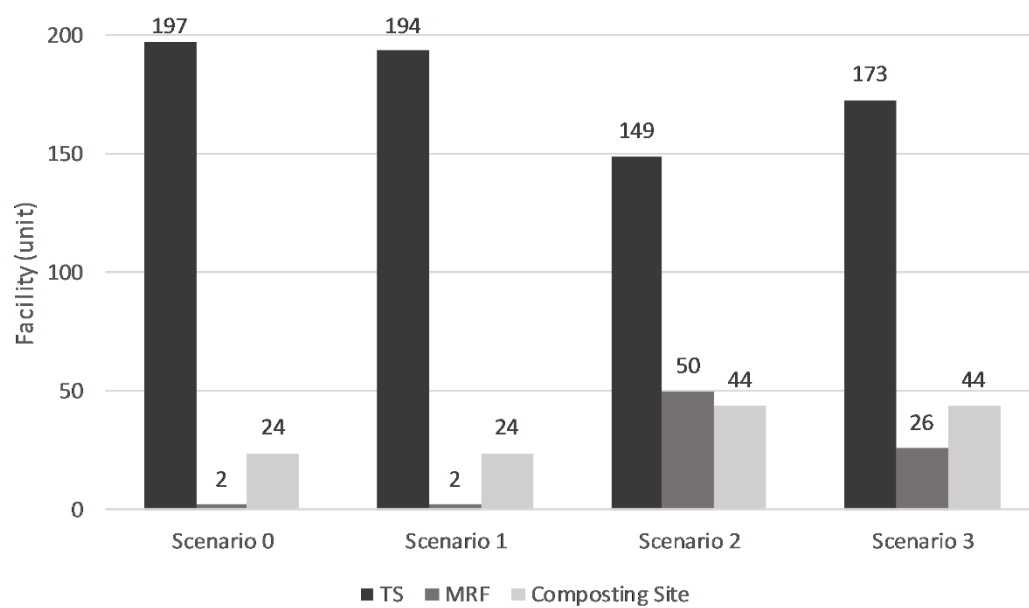

Fig. S6. Facilities and landfilled waste reduction

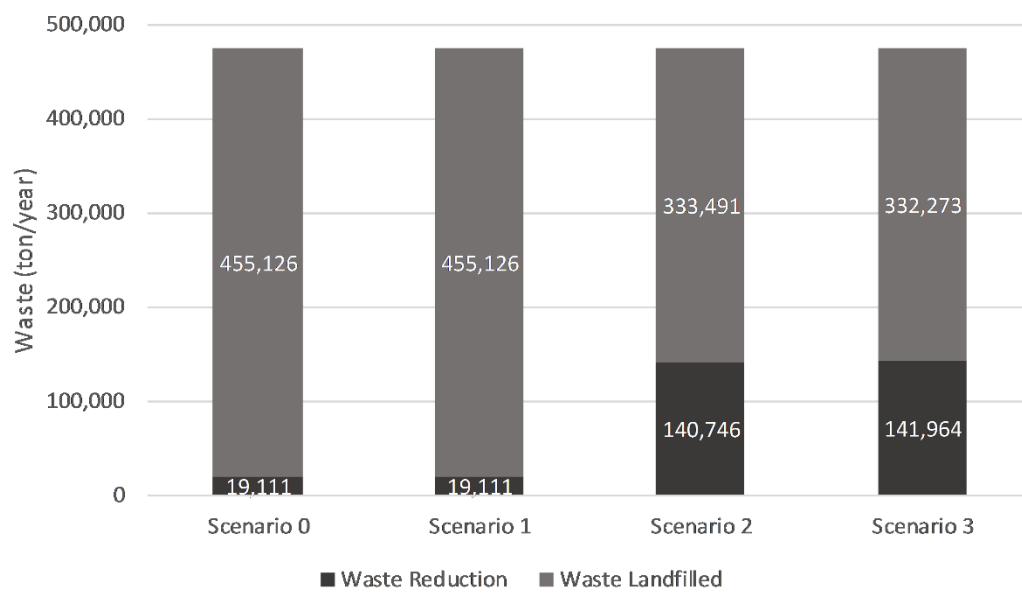

Fig. S7. Reduced and landfilled waste

## **References**

Mega R and Trihadiningrum Y (2010) Perencanaan Material Recovery Facility di Kecamatan Gubeng Kota Surabaya (Design of Material Recovery Facility in Gubeng District, Surabaya City). ITS Digital Repository. [In Indonesian.]

Wahyono S and Sahwan FL (2006) Analisa biaya mekanisasi produksi kompos sistem windrow (Cost analysis of mechanization of the windrow composting production). Jurnal Teknik Lingkungan 11: 87–93. [In Indonesian.]
